Table S1. Daily rate (ml day<sup>-1</sup>) of urine (collected from a flexible latex tubing attached to the tail) excretion in *Pelodiscus sinensis* during 6 days of immersion (control) or emersion

| Day | Control     | Emersion             |
|-----|-------------|----------------------|
| 1   | 11±4 (4)    | 3.4±1.6 (7)          |
| 2   | 16±5 (4)    | 2.0±0.9* (7)         |
| 3   | 8.1±4.5 (4) | 2.9±0.5 (7)          |
| 4   | 15±2 (4)    | 2.1±0.5* (7)         |
| 5   | 7.3±1.9 (4) | 2.2±0.4 (5)          |
| 6   | 15±3 (4)    | 6.7 (1) <sup>†</sup> |

Values represent means ± s.e.m., with number of determinations in parentheses.

\*Significantly different from the corresponding control condition.

<sup>†</sup>Total N=6, but no urine production in 5 out of the 6 turtles.
